# Supplementary material for: Preparation of La2Zr2O7 composite oxides with fluorite/pyrochlore phases by excluding element influences for catalyzing oxidative coupling of methane
Source: Royal Society of Chemistry journal article supplement (doi:10.1039/d3cp03508e), 2023-01-01
Supplement: d3cp03508e1.pdf [file d3cp03508e1.pdf]

## Electronic Supplementary Information

### Preparation of $\text{La}_2\text{Zr}_2\text{O}_7$ composite oxides with fluorite/pyrochlore phases by excluding element influences for catalyzing oxidative coupling of methane

Junwei Xu<sup>a,b#</sup>, Xusheng Zhong<sup>a#</sup>, Rumeng Ouyang<sup>a</sup>, Ying Gong<sup>a</sup>, Yameng Liu<sup>a</sup>,  
Xianglan Xu<sup>a</sup>, Xiuzhong Fang<sup>a</sup>, Chunhui Deng<sup>c</sup>, Xiang Wang<sup>a\*</sup>

a. *Key Laboratory of Jiangxi Province for Environment and Energy Catalysis, College of Chemistry and Chemical Engineering, Nanchang University, Nanchang, 330031, PR China.*

b. *Department of Applied Chemistry, Jiang Xi Academy of Sciences, Nanchang, 330096, China.*

c. *Department of Chemistry, Fudan University, Shanghai 200433, China*

\* *Corresponding author. E-mail: xwang23@ncu.edu.cn (X. Wang)*

# *These authors contributed equally to this work.*

#### 1. Supplementary Experimental Information

##### 1.1 Catalyst characterization

The crystalline structure of the catalyst before and after OCM was analyzed using a Bruker AXS D8 Focus X-ray diffractometer system, which was operated at 40 KV and 30 mA using a Cu target and  $K\alpha$ -ray irradiation. Scans were collected in the  $2\theta$  range of  $10\text{--}80^\circ$  with a step of  $2^\circ/\text{min}$ , and the crystalline structure was identified by using the PDF standard cards in Jade 6.5.

The specific surface area of the catalyst was measured using the ST-08B instrument at 77 K via the Brunauer, Emmett, and Teller method.

X-ray photoelectron spectroscopy (XPS) tests were conducted using a PerkinElmer

PHI-1600 ESCA spectrometer with a single MgK $\alpha$  X-ray source, which was operated at 300 W and 15 kV. The binding energies of all the samples were calibrated with the C1s peak of contaminant carbon (BE = 284.6 eV). The XPS peak fitting of all samples was performed using the Thermo Avantage software. O 1s spectra were fitted and deconvoluted with the Lorentz-Gauss mix function (L:G = 2:8) after subtracting the modified Shirley/Smart background. The full width at half maximum of a single XPS oxygen peak ranged between 1.8 and 2.0 eV.

Fourier transform infrared (FTIR) spectra from 4000 to 400 cm<sup>-1</sup> were acquired using a Nicolet 5700 spectrophotometer with KBr disks. In situ diffuse reflectance FTIR spectroscopy (DRIFTS) experiments were performed on a Bruker Vertex spectrometer equipped with a mercury-cadmium-tellurium detector chilled in liquid nitrogen. A micro-size in situ DRIFT cell equipped with KBr windows was also used; 50 mg of the catalyst powder was pretreated first at 500 °C for 1 h under a 99.9% Ar flow rate of 30 mL/min, after which it was cooled to the target temperature. At this stage, background spectra were collected at a resolution of 4 cm<sup>-1</sup> by accumulating 64 scans in a 30 mL/min Ar flow. All the DRIFTS spectra in this study were obtained by subtracting the corresponding background spectrum. The spectra were recorded continuously for each series of *in situ* experiments until the reaction reached equilibrium at around 30 min.

Raman spectra of the catalysts were obtained using a Renishaw inVia instrument under a laser excitation wavelength of 532 nm. In situ Raman spectra were acquired using the same instrument equipped with a Linkam TS 1500 micro-size in situ cell. The Raman shift ranged between 100 to 1000 cm<sup>-1</sup>.

CH<sub>4</sub>-TPSR-MS (temperature programmed surface reaction-mass spectrometry), CH<sub>4</sub>-pulse reaction, and <sup>18</sup>O<sub>2</sub> pulse reaction were performed on a BelCata II apparatus equipped with a BelMass by using quadrupole as a mass analyzer. The mass spectrometry signals of outlet products (C<sub>2</sub>H<sub>4</sub> m/z=27, C<sub>2</sub>H<sub>6</sub> m/z=30 CO m/z=28 and CO<sub>2</sub> m/z=44) and oxygen isotopes (<sup>18</sup>O<sub>2</sub> m/z=36, <sup>18</sup>O<sup>16</sup>O m/z=34 and <sup>16</sup>O<sub>2</sub> m/z=32) were measured instantaneously with the mass spectrometer system; 200 mg of a single sample was pretreated at 800 °C under a pure He atmosphere (30 mL/min) for 30 min, after which it was cooled to 50 °C. The sample pretreatment process for all subsequent

testing experiments was the same.

To perform CH<sub>4</sub>-TPSR-MS in the presence or absence of gaseous O<sub>2</sub>, the sample (200 mg) was subjected to pretreatment, a flow of mixed gas (either CH<sub>4</sub>:O<sub>2</sub>:He=4:1:5 (60 mL/min) or CH<sub>4</sub>:He=4:5 (60 mL/min)) was introduced, and the temperature was increased from 50 to 900 °C at a rate of 10 °C/min.

For the CH<sub>4</sub> pulse test, the pretreated sample was heated at a rate of 10 °C/min to 750 °C and subjected to adsorption in a 10% O<sub>2</sub>/Ar gas mixture until saturation was achieved (for 30 min). Subsequently, 1 mL of methane was pulsed continuously every 3 min, and the relevant mass spectrometry signals were recorded. For the <sup>18</sup>O<sub>2</sub> pulse reaction, the pretreated sample was heated at a rate of 10 °C/min to 750 °C, 1 mL of 3% <sup>18</sup>O<sub>2</sub>/He was added for each pulse, and the relevant mass spectrometry signals were obtained.

The ultraviolet-visible (UV-vis) absorbance spectra of the catalysts were acquired from 200 to 800 nm using a Cary 100 UV–visible spectrophotometer (Agilent). The emission spectra of the samples were obtained using a Xe 900 fluorescence spectrometer (Edinburgh, UK).

Electron paramagnetic resonance (EPR) spectra were obtained on a JEOL FA-200 EPR spectrometer, which was operated at a field modulation of 100 kHz and microwave frequencies of 9067.558 MHz. The samples were first pretreated in an oxygen atmosphere at 750 °C for 1 h and then cooled to room temperature. Then, the samples were evacuated and placed in liquid nitrogen at -196 °C prior to collecting the EPR signals.

CO<sub>2</sub>-temperature programmed desorption (TPD) was performed on an Autochem-II 2920 apparatus equipped with a TCD detector; 0.1 g of the sample was loaded into the quartz reactor, sandwiched between layers of quartz wool, and pretreated at 800 °C under a pure He flow (30 mL/min) for 30 min. Subsequently, the temperature was reduced to 50 °C and a 30 mL/min CO<sub>2</sub> flow was introduced until adsorption saturation was achieved (1 h). Again, a pure He (30 mL/min) flow was introduced for 1 h to remove the physically adsorbed CO<sub>2</sub> content, and the reactor temperature was increased from 50 to 800 °C at a rate of 10 °C/min. The amount of CO<sub>2</sub> desorbed was measured

using a  $\text{MgCO}_3$  (99.9 %) standard, which undergoes completely decomposition at around 600 oC according to the following stoichiometric equation:  $\text{MgCO}_3 = \text{MgO} + \text{CO}_2 \uparrow$ .

## 2. Supplementary Results

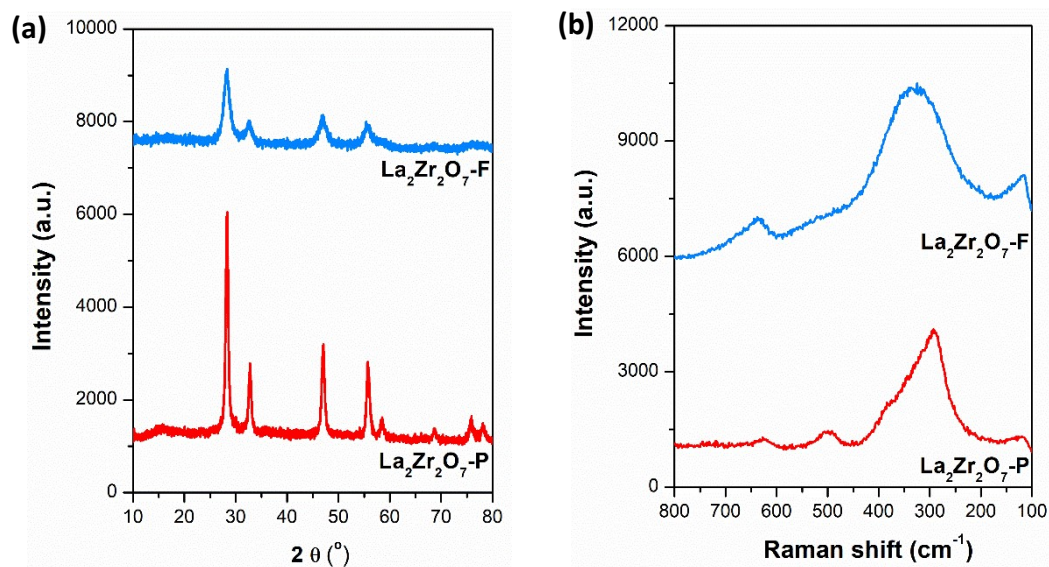

**Fig. S1** (a) XRD patterns of the spent catalysts, (b) Raman spectra of the spent catalysts.
